# Supplementary material
Source: publisher site journal article supplement (https://www.dovepress.com/article/444009)
Supplement: Supplementary file 1 [file get_supplementary_file.php]

**Supplementary file of Extracellular vesicles maintain blood-brain barrier integrity by the suppression of Caveolin-1/CD147/VEGFR2/MMP pathway after ischemic stroke**

**Neurological Function scores**

For Longa score, the score crietia is as follows: 0 = no neurological deflict; 1= unable to fully extend unilateral fore paw; 2= circling toward paralyzed side while walking; 3= falling to the paralyzed side while walking; 4= unable to walk independently; 5= Death.

For mNSS score, the score crietia is as follows:

1. Motor tests (normal: 0; maximum: 3):

Tail raising

1: Flexion of fore paw

1: Flexion of hind paw

1: Head position alteration >10° to vertical axis in 30 s

1. Walking tests (normal: 0; maximum: 3)

0: Normal walk

1: Unable to straight walk

2: Side circling

3: Side fall down

1. Sensory tests (normal: 0; maximum: 2)

1: Placing test (visual and tactile)

2: Proprioceptive test (deep sensation, pushing the paw against the table edge to stimulate limb muscles)

1. Beam balance tests (normal: 0; maximum: 6)

0: Balances with steady posture

1: Grasps side of beam

2: Hugs the beam and one limb falls down from the beam

3: Hugs the beam and two limbs fall down from the beam, or spins on beam (>60 s)

4: Attempts to balance on the beam but falls off (>40 s)

5: Attempts to balance on the beam but falls off (>20 s)

6: Falls off: No attempt to balance or hang on to the beam (<20 s)

1. Reflexes absent and abnormal movements (normal: 0; maximum: 4)

1: Pinna reflex (head shake when touching the auditory meatus)

1: Corneal reflex (eye blink when lightly touching the cornea with cotton)

1: Startle reflex (motor response to a brief noise from snapping a clipboard paper)

1: Seizures, myoclonus, myodystonia

Maximum points: 18

**The primary and secondary antibodies used in this study:**

ZO-1 (1:1000 for western blotting, and 1:200 for immunofluorescence, 61–7300, Invitrogen);

Caveolin-1 (1:1000 for western blotting, and 1:250 for immunofluorescence, ab2910, Abcam);

TSG 101 (1:1000, ab125011, Abcam); CD9 (1:1000, ab92726, Abcam);

CD63 (1:500, ab216130, Abcam); ALIX (1:1000, ab117600, Abcam);

CD147 (1:2000 for western blotting, and 1:250 for immunofluorescence, AF5221, Affinity Biosciences);

VEGFA (1:1000, AF5131, Affinity Biosciences);

VEGFR2 (1:1000 for western blotting, and 1:200 for immunofluorescence, 26415-1-AP, Proteintech);

Occludin (1:500 for western blotting, and 1:200 for immunofluorescence, 71-1500, Invitrogen);

β-actin (1:5000, ab8227,Abcam);

Goat Anti-Rabbit IgG H&L (HRP) (1:3000, ab6721, Abcam).

Goat Anti-Rabbit IgG H&L (Alexa Fluor® 488) (1:500, ab150113, Abcam)

Goat Anti-Rabbit IgG H&L (Alexa Fluor® 594) (1:500, ab150080, Abcam)

Goat Anti-Rabbit IgG H&L (Alexa Fluor® 488) (1:500, ab150077, Abcam)

**siRNAs used in this study:**

Cav-1 siRNA1 (sense 5’-3’): CUGCGAUCCACUCUUUGAATT.

Cav-1 siRNA1 (antisense 5’-3’): UUCAAAGAGUGGAUCGCAGTT.

Cav-1 siRNA2 (sense 5’-3’): GCAUCCCAAUGCCACUCAUTT.

Cav-1 siRNA2 (antisense 5’-3’): AUGAGUGCCAUUGCCAUGCTT.

CD147 siRNA1 (sense 5’-3’): GGAUCAAGGUCGGAAAGAATT.

CD147 siRNA1 (antisense 5’-3’): UUCUUUCCGACCUUGAUCCTT.

CD147 siRNA2 (sense 5’-3’): GCUGACCAUCAGCAACCUUTT

CD147 siRNA2 (antisense 5’-3’): AAGGUUGCUGAUGGUCAGCTT

Negative control siRNA (sense 5’-3’): UUCUCCGAACGUGUCACGUTT.

Negative control siRNA (antisense 5’-3’): ACGUGACACGUUCGGAGAATT.

**primers used in this study:**

MMP-2 Forward: 5’-ACCTGAACACTTTCTATGGCTG-3’.

MMP-2 Reverse: 5’-CTTCCGCATGGTCTCGATG-3’.

MMP-9 Forward: 5’-CTGGACAGCCAGACACTAAAG-3’.

MMP-9 Reverse: 5’- CTCGCGGCAAGTCTTCAGAG-3’.
